# Supplementary material
Source: publisher site journal article supplement (https://www.spandidos-publications.com/179/downloadSupplementary)

Figure S1. (A) Representative flow cytometry results (left) and summary of the frequency of MDSCs (right) in the bone marrow (BM) of 12-week-old ICR and NOD mice. (B) Representative flow cytometry results (left) and summary of the frequency of MDSCs (right) in the SP of 12-week-old ICR and NOD mice. Error bars indicate SEM. \*\* $P < 0.01$ . MDSCs, myeloid-derived suppressor cells; SP, spleen.

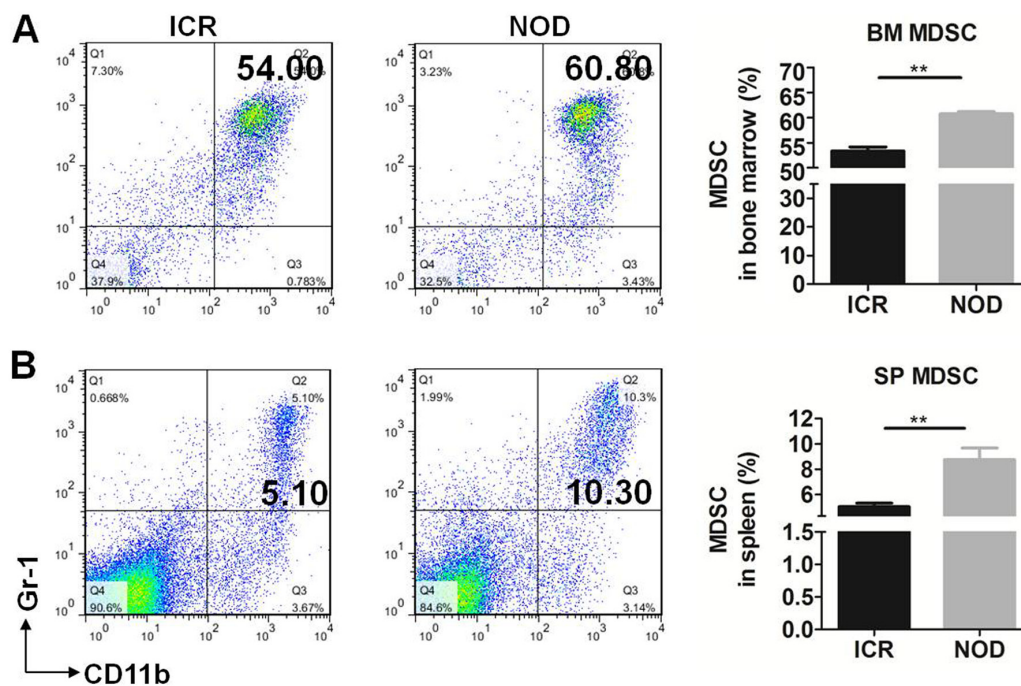

Figure S2. (A) Summary of the number of MDSCs in the spleen from NOD mice. (B) Representative flow cytometry results (left) and summary of the frequency of granulocytic MDSCs (G-MDSCs, CD11b<sup>+</sup>Ly6C<sup>+</sup>Ly6G<sup>-</sup>) and monocytic MDSCs (M-MDSCs, CD11b<sup>+</sup>Ly6C<sup>low</sup>Ly6G<sup>+</sup>) in BM and SP of IL-12-treated NOD (NOD+IL-12) or control (Ctrl) mice (middle), and the summary of the number of G-MDSCs and M-MDSCs in SP of IL-12-treated NOD mice or control mice (left). (C) Representative flow cytometry results (left) and summary of the frequency of G-MDSCs and M-MDSCs in BM and SP of anti-IL-12-treated NOD (NOD+Anti-IL-12) or control (Ctrl) mice (middle), and the summary of the number of G-MDSCs and M-MDSCs in SP of anti-IL-12-treated NOD or control mice (left). Error bars indicate SEM. \*P<0.05. IL-12, interleukin-12; MDSCs, myeloid-derived suppressor cells; G-MDSCs, granulocytic MDSCs; M-MDSCs, monocytic MDSCs; BM, bone marrow; SP, spleen.

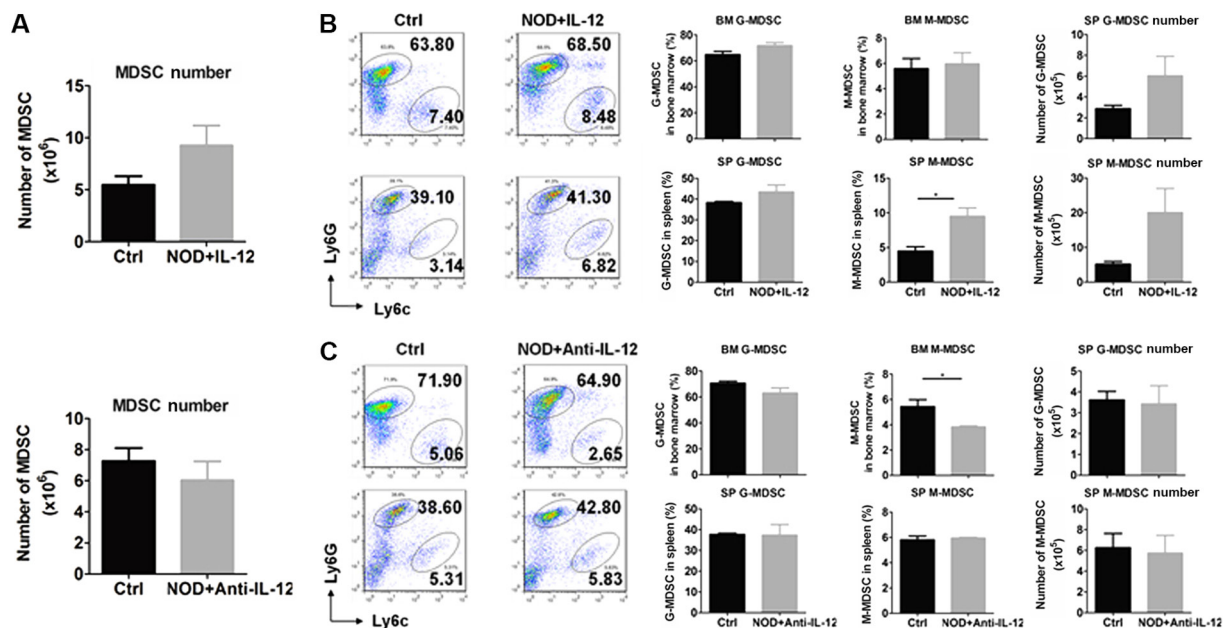

Figure S3. (A) Representative flow cytometry results and (B) summary of the percentages and numbers of G-MDSCs and M-MDSCs in the SP of 4-, 6-, 8- and 10-week-old (4W, 6W, 8W and 10W) *Il-12<sup>-/-</sup>* B6 mice. Error bars indicate SEM. \*P<0.05, \*\*P<0.01 and \*\*\*P<0.001. MDSCs, myeloid-derived suppressor cells; G-MDSCs, granulocytic MDSCs; M-MDSCs, monocytic MDSCs; SP, spleen.

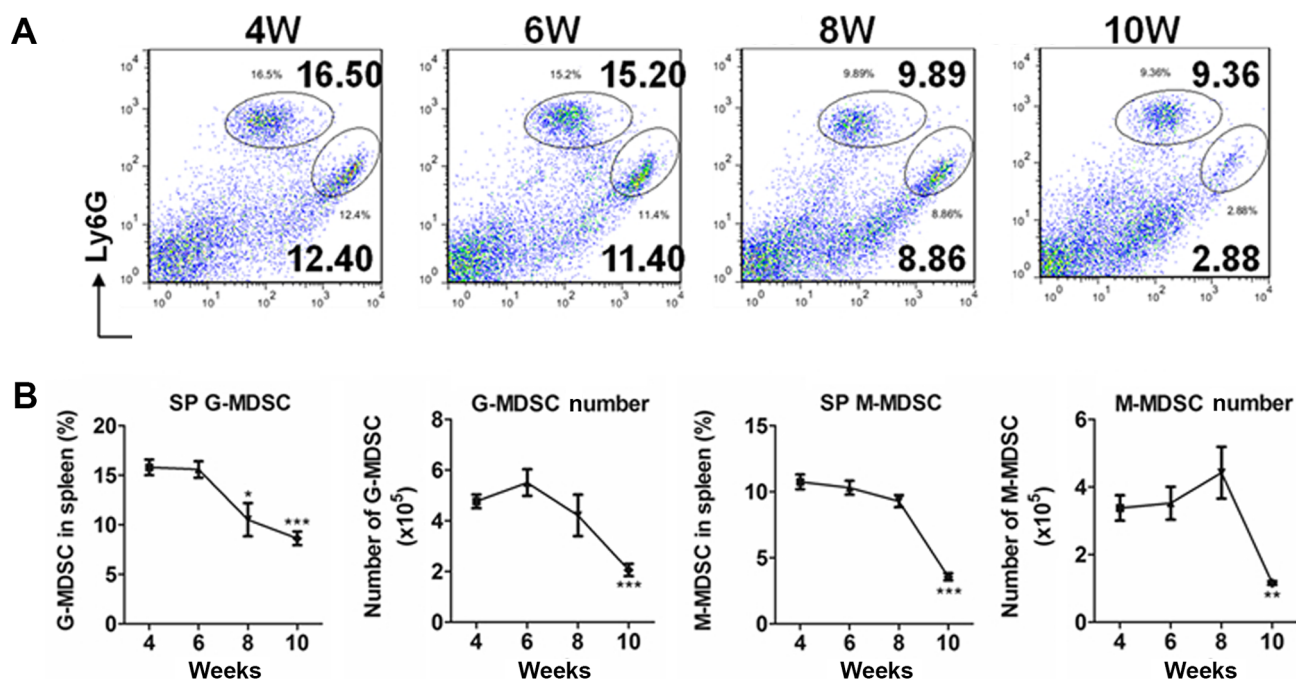

Figure S4. (A) Representative flow cytometry results (left) and summary of the frequency of CD4<sup>+</sup>CD25<sup>+</sup>Foxp3<sup>+</sup> Treg cells in the spleen (right) in the IL-12-treated NOD (NOD+IL-12) and control (Ctrl) mice (top panel) as well as in the anti-IL-12-treated NOD (NOD+Anti-IL-12) and control (Ctrl) mice (bottom panel). (B) Representative flow cytometry results (left) and summary of the frequency of CD11b<sup>+</sup>F4/80<sup>+</sup> M in SP (right) in the different mouse groups. Error bars indicate SEM. \*P<0.05. IL-12, interleukin-12; M, macrophages.

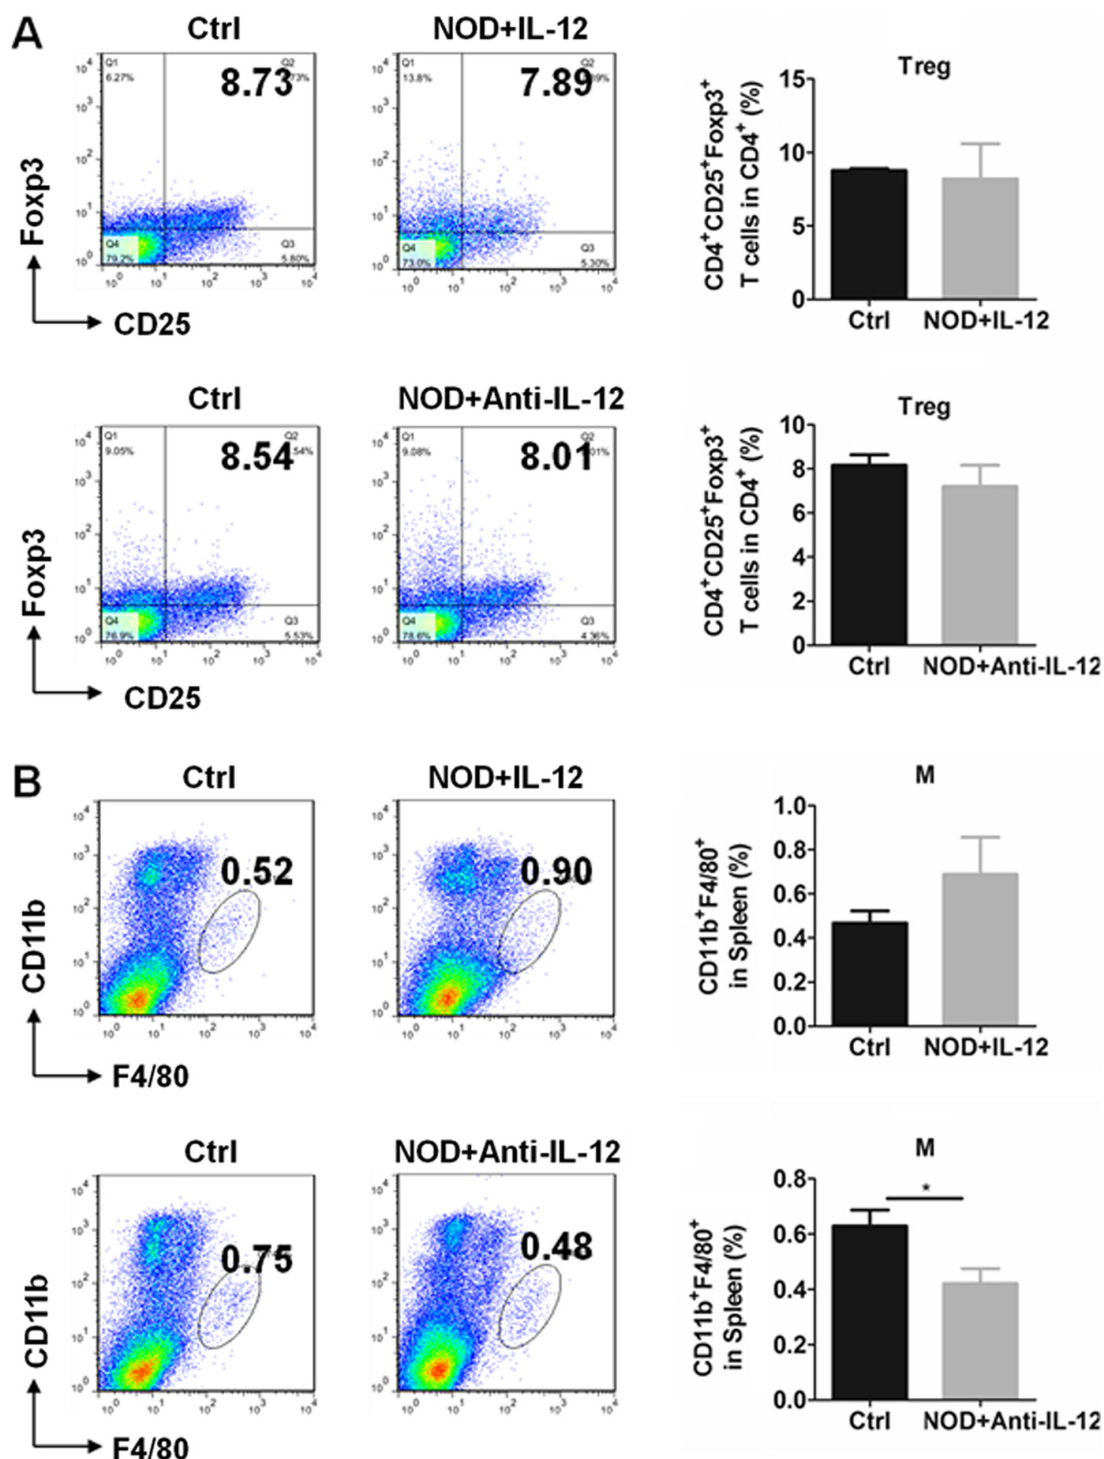

Supplement: Supplementary file 1 [file downloadSupplementary]
